# Supplementary material for: Tunable functionalization of nano-emulsions using amphiphilic polymers
Source: Royal Society of Chemistry journal article supplement (doi:10.1039/d0sm01952f), 2020-12-11
Supplement: d0sm01952f1.pdf [file d0sm01952f1.pdf]

*SUPPLEMENTARY INFORMATION*

---

## Tunable Functionalization of Nano-emulsions Using Amphiphilic Polymers

Asad Ur Rehman,<sup>a</sup> Nicolas Anton,<sup>a,b,\*</sup> Sophie Bou,<sup>c</sup> Jérémy Schild,<sup>c</sup> Nadia  
Messaddeq,<sup>d</sup> Thierry Vandamme,<sup>a,b</sup> Salman Akram,<sup>a</sup> Andrey Klymchenko,<sup>c</sup> Mayeul  
Collot<sup>c,\*</sup>

<sup>a</sup> *Université de Strasbourg, CNRS, CAMB UMR 7199, F-67000 Strasbourg, France*

<sup>b</sup> *INSERM (French National Institute of Health and Medical Research), UMR 1260, Regenerative Nanomedicine (RNM), FMTS, Université de Strasbourg, F-67000 Strasbourg, France*

<sup>c</sup> *Université de Strasbourg, CNRS, LPB 7021, F-67000 Strasbourg, France*

<sup>d</sup> *Université de Strasbourg, IGBMC, Inserm U1258, CNRS UMR7104, F-67000 Strasbourg, France*

## Synthesis of Rh-DBCO

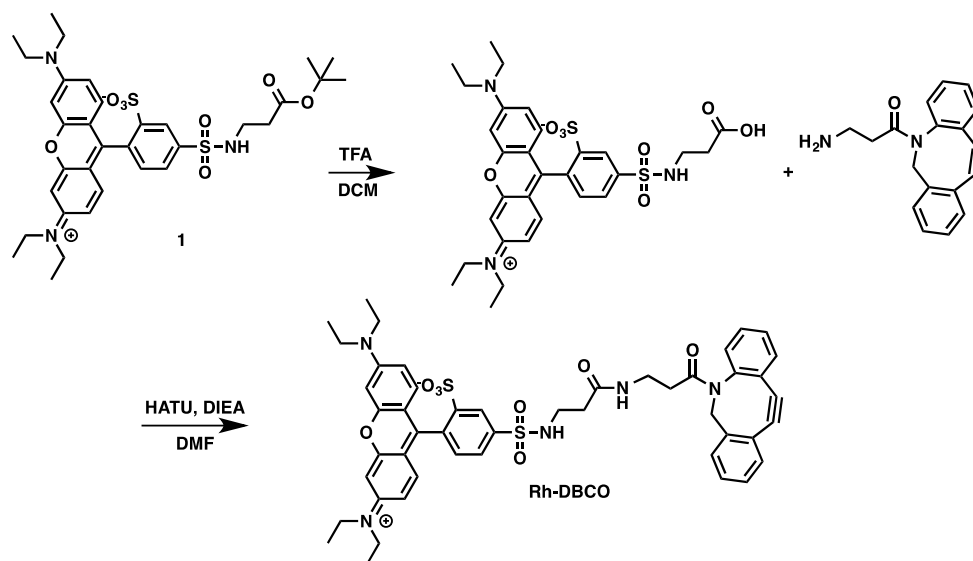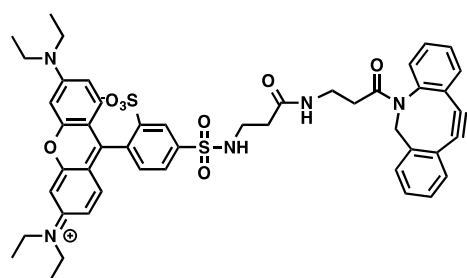

**Rh-DBCO.** To a solution of sulforhodamine 1 (50 mg, 0.073 mmol) in DCM (2 mL) were added 2 mL of TFA. After 2h, the solvents were evaporated and the deprotected carboxylic acid was involved in the next step without any further purification. To a solution of deprotected **1** (46 mg, 0.073 mmol) and DBCO-NH<sub>2</sub> (20 mg, 0.073 mmol, 1 eq) in DMF (5 mL) was added HATU (33 mg, 0.087 mmol, 1.2 eq) followed by DIEA (28  $\mu$ L, 0.219 mmol, 3 eq). After 1 h00 the solvents were evaporated and the crude was first purified by column chromatography on silica gel (DCM/MeOH: 95/5 to 9/1) to obtain 59 mg g of **Rh-DBCO** (92% yield) as a dark violet syrup. R<sub>f</sub>= 0.62 (DCM/MeOH: 9/1). <sup>1</sup>H-NMR (400 MHz, CDCl<sub>3</sub>):  $\delta$  8.88 (s, 1H, H-Ar Rhod), 8.02-8.00 (m, 1H, H-Ar Rhod), 7.77 (br s, 1H, NH), 7.64 (d,  $J$  = 7.6 Hz, 1H, H-Ar Rhod), 7.37-7.18 (m, 8H, H-Ar DBCO + CDCl<sub>3</sub>), 7.07 (s, 1H, H-Ar Rhod), 6.84 (t,  $J$  = 8.3 Hz, 2H, H-Ar Rhod), 6.69-6.66 (m, 3H, H-Ar Rhod), 5.20 (d,  $J$  = 13.4 Hz, 1H, PhN-CH DBCO), 3.65-3.53 (m, 9H, PhN-CH DBCO + NCH<sub>2</sub> Rhod), 3.34-3.24 (m, 4H, CH<sub>2</sub> and CH<sub>2</sub> DBCO), 2.54-2.48 (m, 1H, CH DBCO), 2.16-2.02 (m, 4H, CH<sub>2</sub>), 1.29 (s, 12H, CH<sub>3</sub> Rhod). HRMS (ESI+), calcd for C<sub>48</sub>H<sub>50</sub>N<sub>5</sub>O<sub>8</sub>S<sub>2</sub> [M+H]<sup>+</sup> 888.0670, found 888.3106.

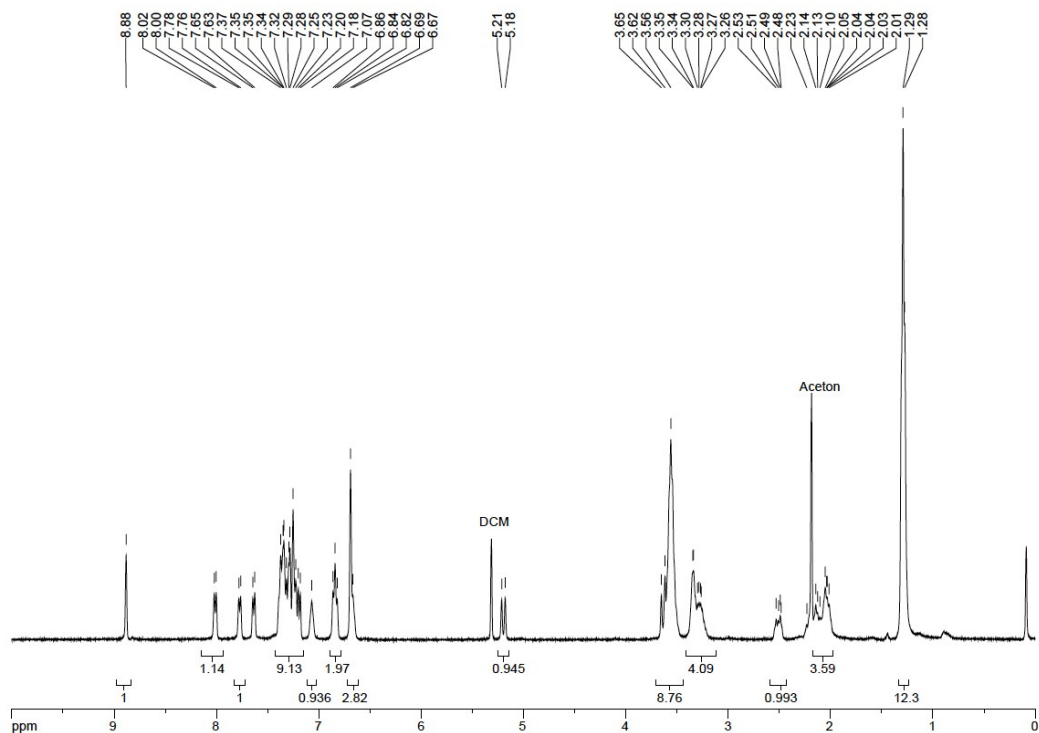

$^1\text{H}$  NMR spectrum of **Rh-DBCO**.

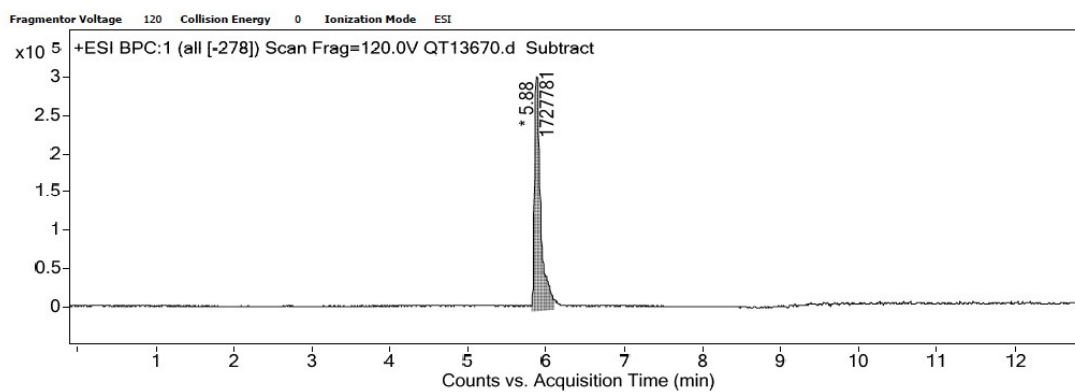

HPLC trace of **Rh-DBCO**. Conditions: column Zorbax SB-C18 50 mm x 2.1 mm, particles size = 1.8  $\mu\text{m}$ . Temperature = 40°C. 0.5 mL/min, ACN (0.05% formic acid)/Water (0.05% formic acid): 2/98 to 100/0 in 8 min.

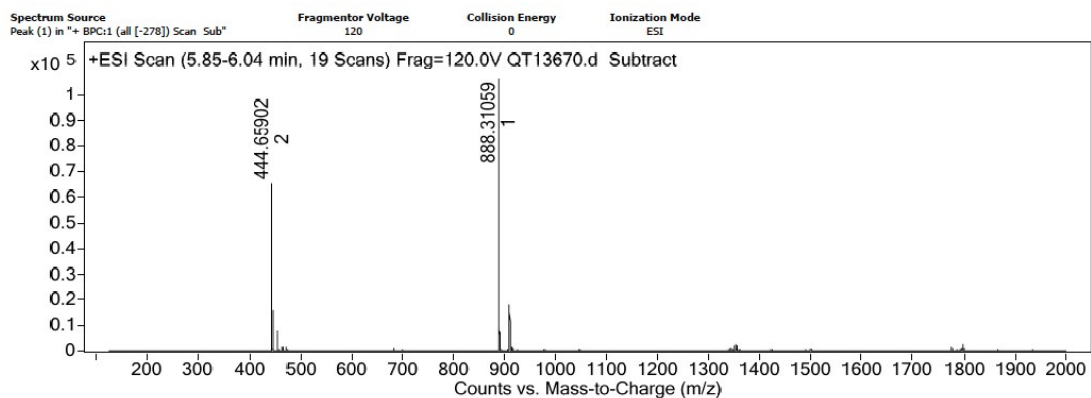

HRMS spectrum of **Rh-DBCO**.

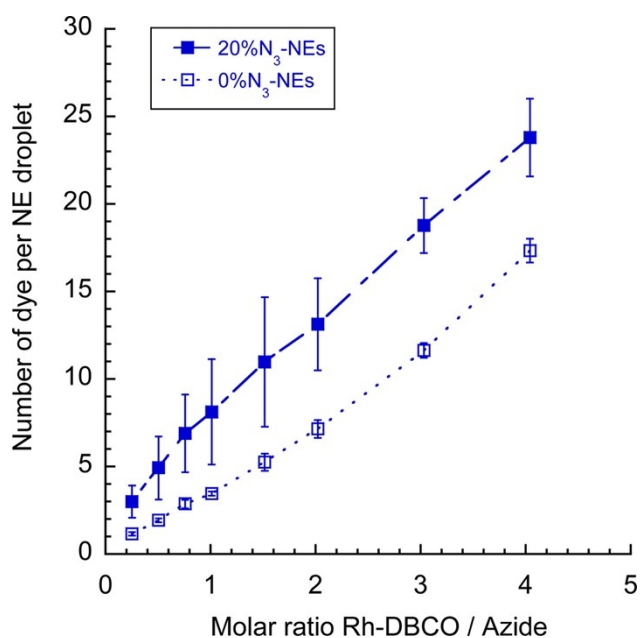

**Figure S1:** Quantification of the total number of dye molecules (Rh-DBCO) which are attached to the NEs droplets. Comparison of the 20% $N_3$ -NEs and the control without azides, 0% $N_3$ -NEs.

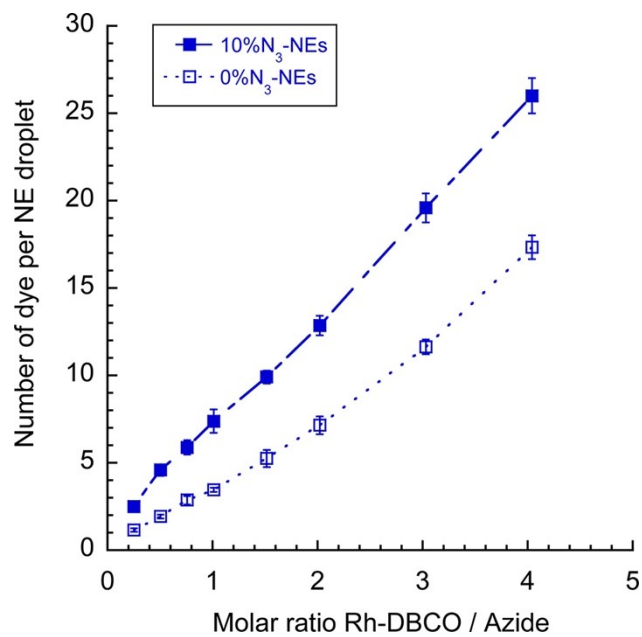

**Figure S2:** Quantification of the total number of dye molecules (Rh-DBCO) which are attached to the NEs droplets. Comparison of the 10%N<sub>3</sub>-NEs and the control without azides, 0%N<sub>3</sub>-NEs.
